# Supplementary material for: A phthalocyanine-based porous organic polymer for a lithium-ion battery anode
Source: Royal Society of Chemistry journal article supplement (doi:10.1039/d3dt02548a), 2023-01-01
Supplement: d3dt02548a1.pdf [file d3dt02548a1.pdf]

# Phthalocyanine Based Porous Organic Polymer for Lithium Ion Battery Anode

Lihua Guo, Chunhua Li, Yougui Zhou, Xinmeng Hao, Huipeng Li, Hong Shang\* and  
Bing Sun\*

School of Science, China University of Geosciences (Beijing), Beijing 100083, P. R.  
China

## Experimental details:

### (1) Synthesis of 2(3),9(10),16(17),23(24)-tetraiodophthalocyanine $H_2Pc(I)_4$

4-iodo-phthalonitrile (1 g) was added into a 25 mL reaction tube with pentanol (8 mL) and DBU (8 drops) under the protection of  $N_2$ . The reaction was heated to 110 °C for 4h. After the reaction, the product was purified by silica gel column with  $CH_2Cl_2$ /hexane (V/V, 6/1) as the eluent. Repeated chromatography followed by recrystallization from methanol and dichloromethane gave a purified product  $H_2Pc(I)_4$  (480 mg, 48%) as green powder.

### (2) Synthesis of 4,4',4'',4'''-(phthalocyanine-2(3),9(10),16(17),23(24)-tetrayl)tetrakis(2-methyl but-3-yn-2-ol) $H_2Pc(ethanol)_4$

$\beta$ -tetraiodine phthalocyanine (344 mg), bis (triphenylphosphine) palladium dichloride (3.0 mg), and CuI (0.3 mg) were added to a 25 mL reaction tube. Under  $N_2$  protection, THF (4 mL), triethylamine (8 mL), and methyl butynol (732  $\mu$ L) were added and reacted at room temperature for 24h. The solvent was removed by vacuum distillation, and the sample was purified with THF/hexane (V/V, 6/1). Repeated chromatography followed by recrystallization from THF and hexane gave a purified

product  $\text{H}_2\text{Pc}(\text{etynol})_4$  (95 mg, 34%) as green powder.

(3) Synthesis of 2(3),9(10),16(17),23(24)-tetra ethynyl phthalocyanine  $\text{H}_2\text{Pc}(\text{ethynyl})_4$   $\beta$ -tetraethylenol phthalocyanine (264 mg) and NaOH (148 mg) were added to a 25 mL reaction tube. Under the  $\text{N}_2$  protection, THF (6 mL) and toluene (6 mL) were added. Then, the tube was heated to  $90^\circ\text{C}$  and reacted for 12h. After the reaction, the solvent was distilled and the product was recrystallized with THF/hexane to obtain  $\text{H}_2\text{Pc}(\text{ethynyl})_4$  (65 mg, 31%) as green powder.

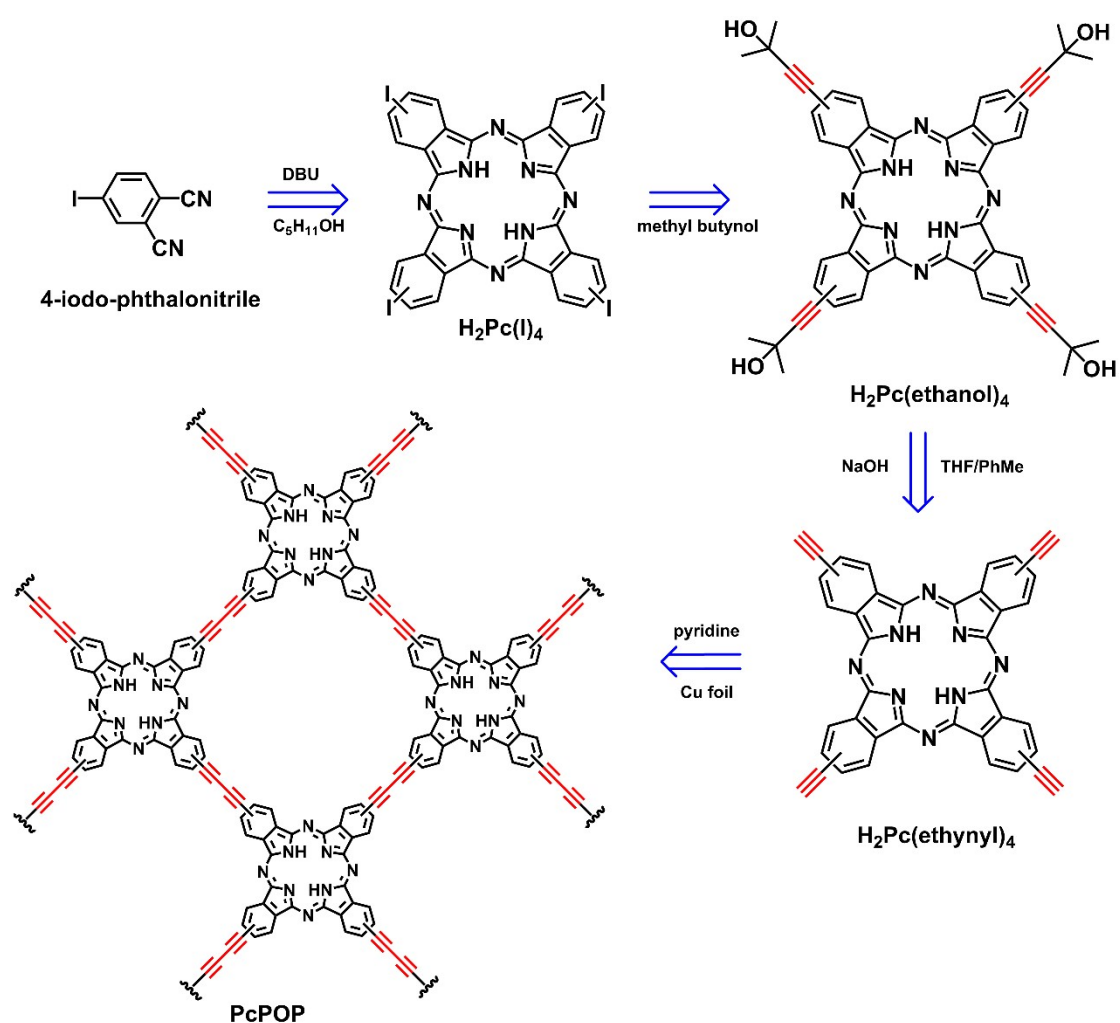

**Scheme S1** The synthetic route for PcPOP.

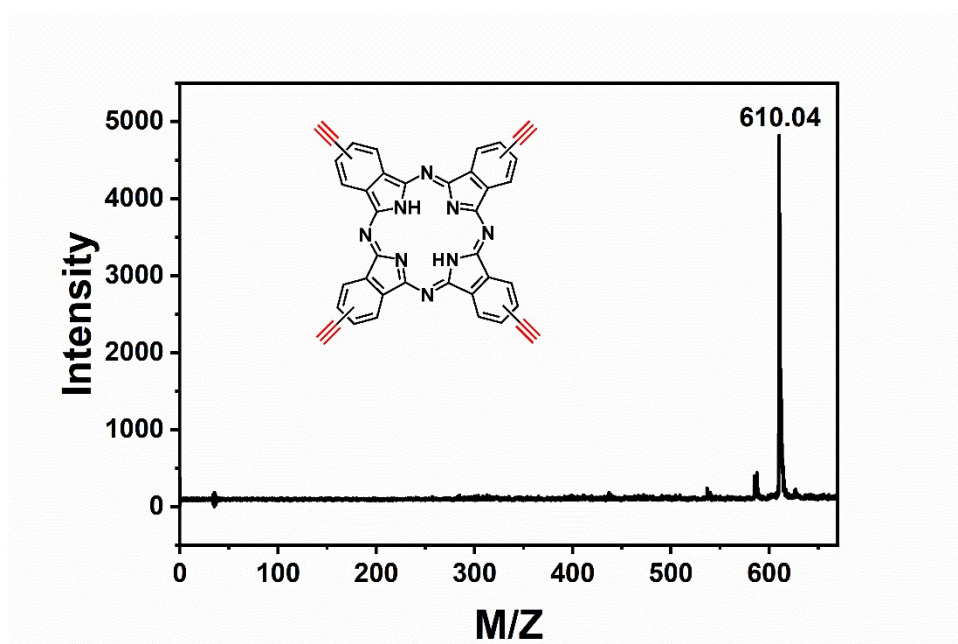

**Fig.S1** MS spectrum of 2(3),9(10),16(17),23(24)-tetraethynylphthalocyanine  
 $\text{H}_2\text{Pc}(\text{ethynyl})_4$ .

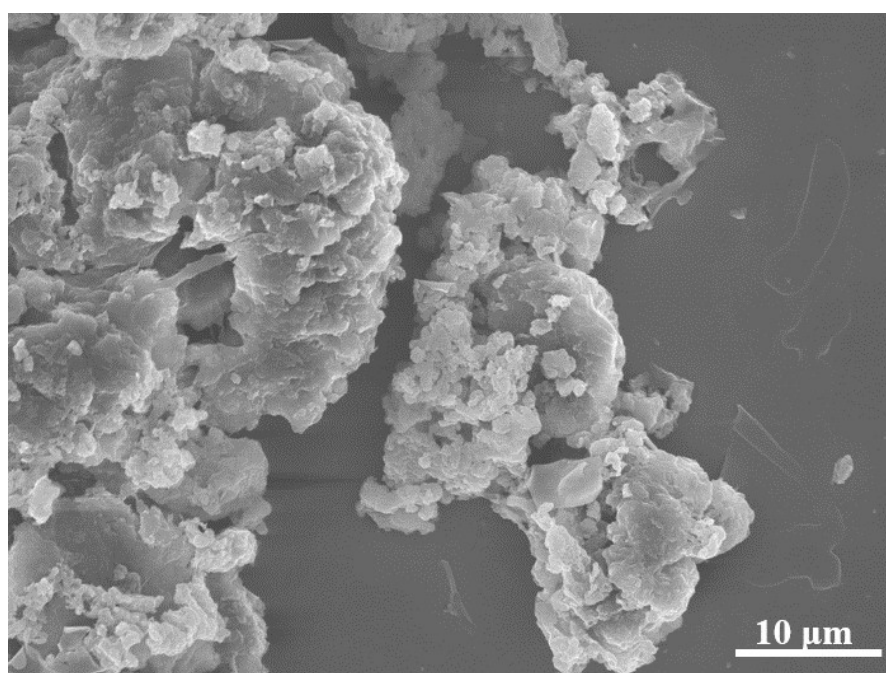

**Fig.S2** SEM image of PcPOP (EDS mapping).

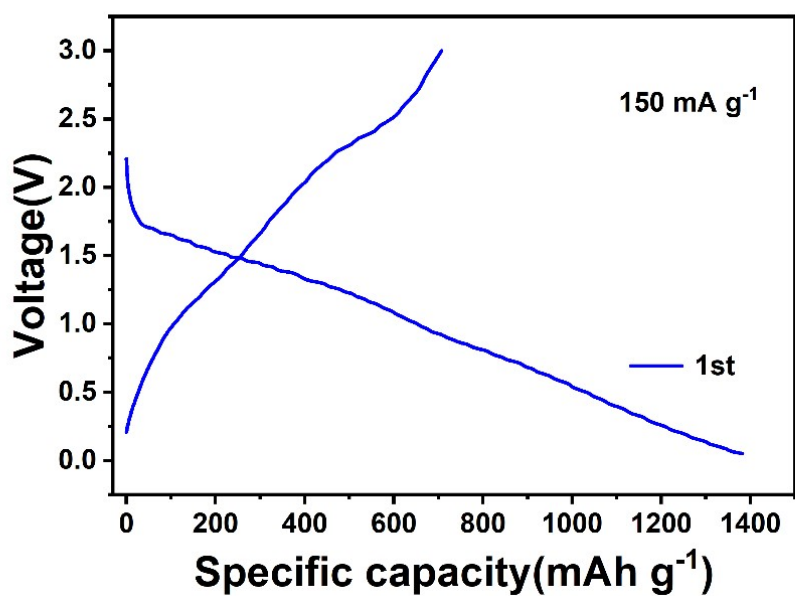

**Fig.S3** First charge/discharge curves of the PcPOP under the current density of 150 mA g<sup>-1</sup>.

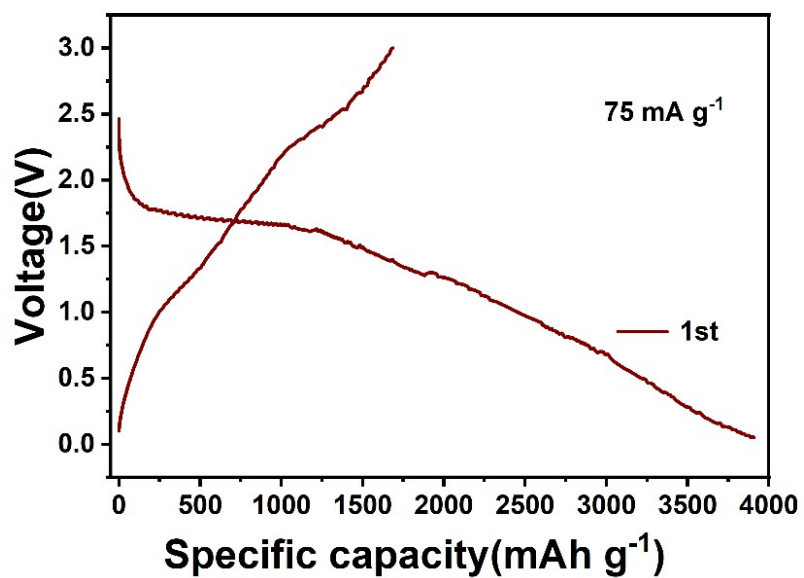

**Fig.S4** First charge/discharge curves of the PcPOP under the current density of 75 mA g<sup>-1</sup>.

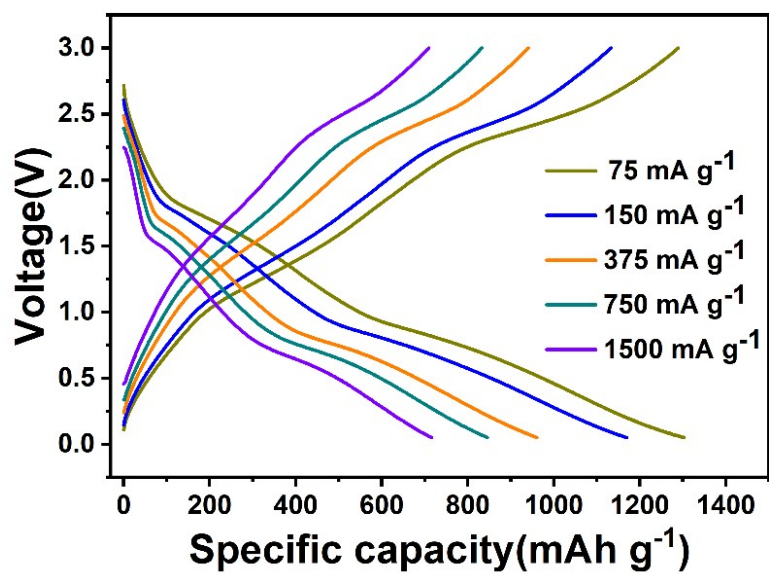

Fig.S5 Charge/discharge curves of the PcPOP at different current densities.

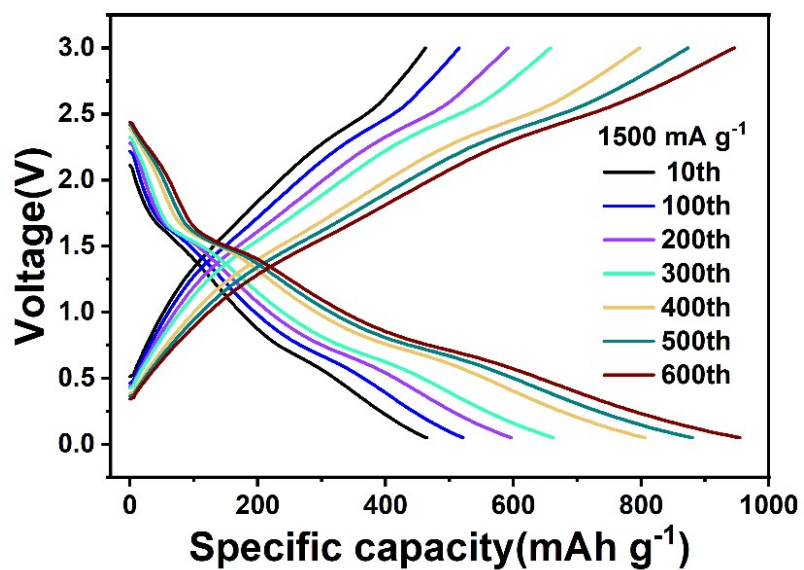

Fig.S6 Charge/discharge curves of PcPOP electrode at the current density of 1500 mA g<sup>-1</sup>.

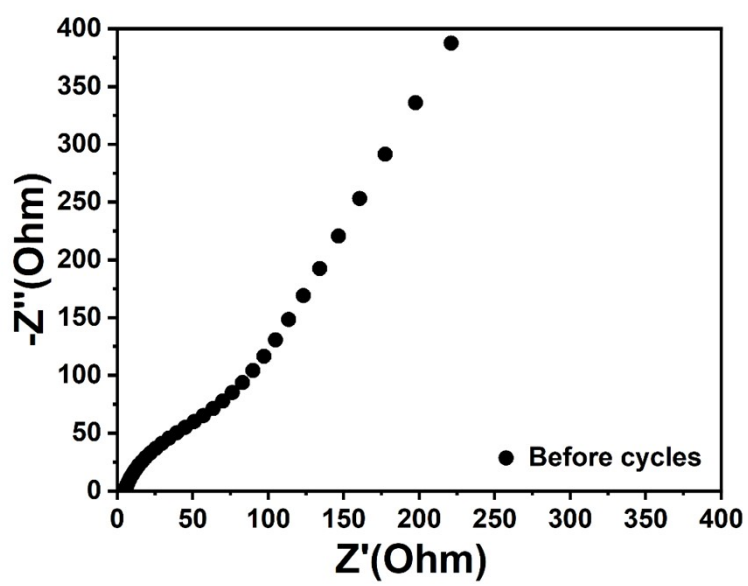

**Fig.S7** Nyquist plot of the PcPOP electrodes before cycles.
